# Supplementary material for: Motivation and competence of participants in a learner-centered student-run clinic: an exploratory pilot study
Source: PubMed Central journal article supplement (PMC5264437; doi:10.1186/s12909-017-0856-9), 2017-01-25
Supplement: 12909_2017_856_MOESM1_ESM.pdf [file 12909_2017_856_MOESM1_ESM.pdf]

### Evaluation of CanMEDS competencies

After each consultation in the LC-SRC faculty from internal medicine evaluated the CanMEDS competencies for the team that performed the consultation. To evaluate the consultation the CanMEDS mini-CEX was used to grade and provide feedback. These CanMEDS mini-CEX were regularly used by faculty to evaluate clinical competence of students in their regular clerkships with a similar form. The seven CanMEDS competencies were scored on a 5-point Likert scale (compared to the level of a junior doctor, 3 meant achieving a junior doctor level, >3 better, <3 worse), see below.

| <b>Mini-Clinical Evaluation Exercise (Mini-CEX)</b> |                                                                                                                        |  |  |                       |                                     |          |                               |                                      |          |
|-----------------------------------------------------|------------------------------------------------------------------------------------------------------------------------|--|--|-----------------------|-------------------------------------|----------|-------------------------------|--------------------------------------|----------|
| <b>CANmeds competencies</b>                         |                                                                                                                        |  |  |                       |                                     |          |                               |                                      |          |
| Team, student names:                                |                                                                                                                        |  |  | Assessor's name:      |                                     |          |                               |                                      |          |
|                                                     |                                                                                                                        |  |  | Clinical condition:   |                                     |          |                               |                                      |          |
| Study years: B1 B2 B3 M1 M2 M3                      |                                                                                                                        |  |  | Date of consultation: |                                     |          |                               |                                      |          |
|                                                     |                                                                                                                        |  |  | <b>Not assessable</b> | <b>Under level of junior doctor</b> |          | <b>level of junior doctor</b> | <b>Beyond level of junior doctor</b> |          |
| <b>Medical expert</b>                               | History taking & physical examination, distinguish main points and side issues, differential diagnosis & making a plan |  |  | N/A                   | 1                                   | 2        | 3                             | 4                                    | 5        |
| <b>Communicator</b>                                 | Patient contact (manners, respects) Giving information and advice                                                      |  |  | N/A                   | 1                                   | 2        | 3                             | 4                                    | 5        |
| <b>Scholar</b>                                      | Critically analyzing medical information sources and using it in a definite plan                                       |  |  | N/A                   | 1                                   | 2        | 3                             | 4                                    | 5        |
| <b>Professional</b>                                 | Sense of responsibility, professional rules, to handle own emotions and difficult or impressive situations             |  |  | N/A                   | 1                                   | 2        | 3                             | 4                                    | 5        |
| <b>Collaborator</b>                                 | Carrying and adapting medical information<br>Respects for others → team player                                         |  |  | N/A                   | 1                                   | 2        | 3                             | 4                                    | 5        |
| <b>Organizer</b>                                    | Structuring and planning, prioritizing, time management, attention to quality, appointments                            |  |  | N/A                   | 1                                   | 2        | 3                             | 4                                    | 5        |
| <b>Health advocate</b>                              | Attention to safety of patients and policy of prevention                                                               |  |  | N/A                   | 1                                   | 2        | 3                             | 4                                    | 5        |
| <b>Final assessment</b>                             |                                                                                                                        |  |  |                       | <b>1</b>                            | <b>2</b> | <b>3</b>                      | <b>4</b>                             | <b>5</b> |
| <b>Feedback:</b>                                    |                                                                                                                        |  |  |                       |                                     |          |                               |                                      |          |
